# Supplementary material for: Design and Synthesis In Silico Drug-like Prediction and Pharmacological Evaluation of Cyclopolymethylenic Homologous of LASSBio-1514
Source: MDPI journal article supplement (doi:10.3390/molecules26164828), 2021-08-10
Supplement: s1 [file s1]

## Supplementary Materials

# Design and Synthesis in Silico Drug-Like Prediction and Pharmacological Evaluation of Cyclopolymethylenic Homologous of LASSBio-1514.

Lidia Moreira Lima <sup>1,2,3,\*</sup>, Tiago Fernandes da Silva <sup>1,3</sup>, Carlos Eduardo da Silva Monteiro <sup>2,4</sup>, Cristiane Aparecida-Silva <sup>1,2</sup>, Walfrido Bispo Júnior <sup>5</sup>, Aline Cavalcanti de Queiroz <sup>5</sup>, Magna Suzana Alexandre-Moreira <sup>5</sup>, Gisele Zapata-Sudo <sup>2,4</sup> and Eliezer J. Barreiro <sup>1,2,3\*</sup>

<sup>1</sup> Instituto Nacional de Ciência e Tecnologia de Fármacos e Medicamentos (INCT-INOFA; <http://www.inct-inofar.ccs.ufrj.br/>). Universidade Federal do Rio de Janeiro, Laboratório de Avaliação e Síntese de Substâncias Bioativas (LASSBio®, <http://www.lassbio.icb.ufrj.br/>) CCS, Cidade Universitária, P.O. Box 68024, Rio de Janeiro-RJ 21941-971, Brasil

<sup>2</sup> Programa de Pós-graduação em Farmacologia e Química Medicinal, Instituto de Ciências Biomédicas, Universidade Federal do Rio de Janeiro, Rio de Janeiro, RJ 21941-902, Brasil

<sup>3</sup> Programa de Pós-graduação em Química, Instituto de Química, Universidade Federal do Rio de Janeiro, Rio de Janeiro, RJ 21941-909, Brasil

<sup>4</sup> Laboratório de Farmacologia Cardiovascular, Universidade Federal do Rio de Janeiro, Rio de Janeiro, RJ 21941-971, Brazil

<sup>5</sup> LaFI—Laboratório de Farmacologia e Imunidade, Instituto de Ciências Biológicas e da Saúde, Universidade Federal de Alagoas, Maceió, AL 57072-900, Brasil

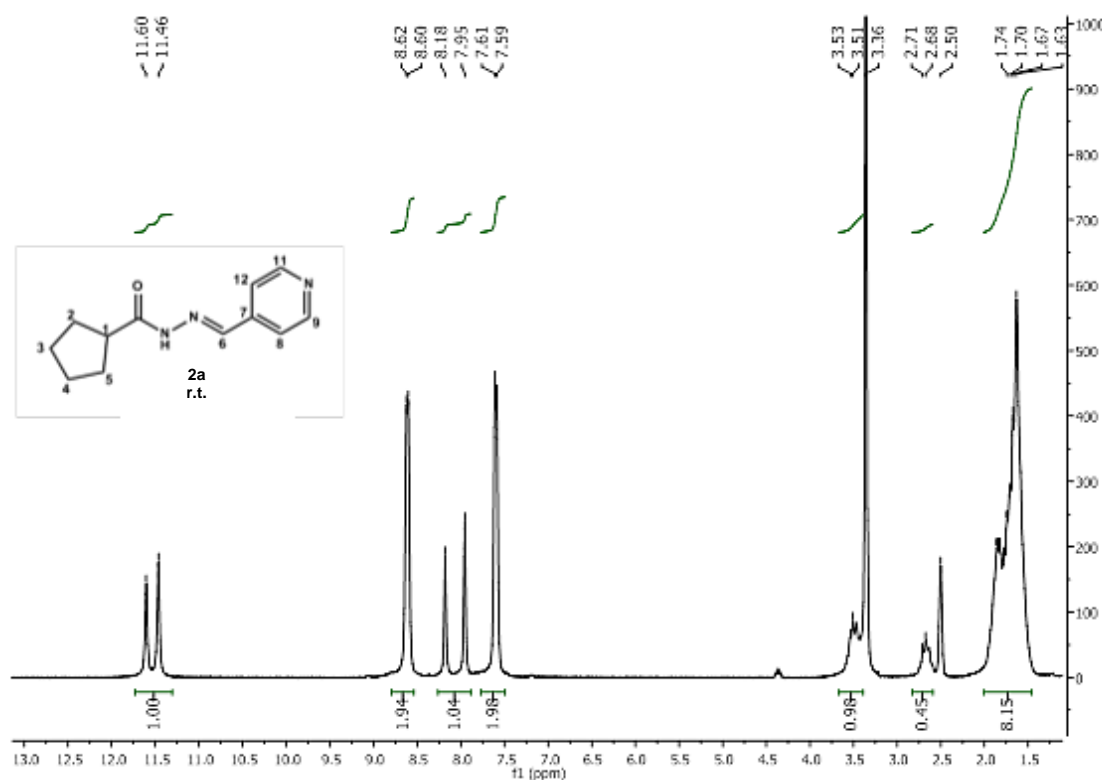

Figure S1. <sup>1</sup>H NMR spectrum of **2a** (DMSO-d<sub>6</sub>, 200 MHz).

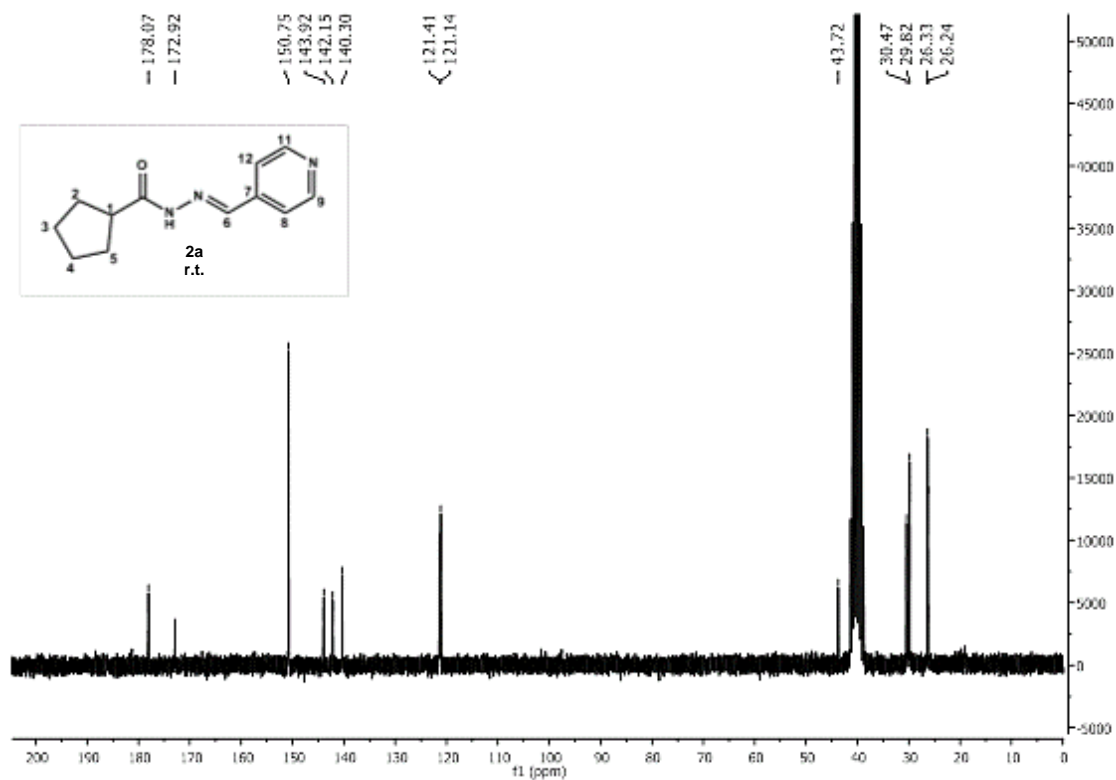

**Figure S2.** <sup>13</sup>C NMR spectrum of **2a** (DMSO-d<sub>6</sub>, 50 MHz).

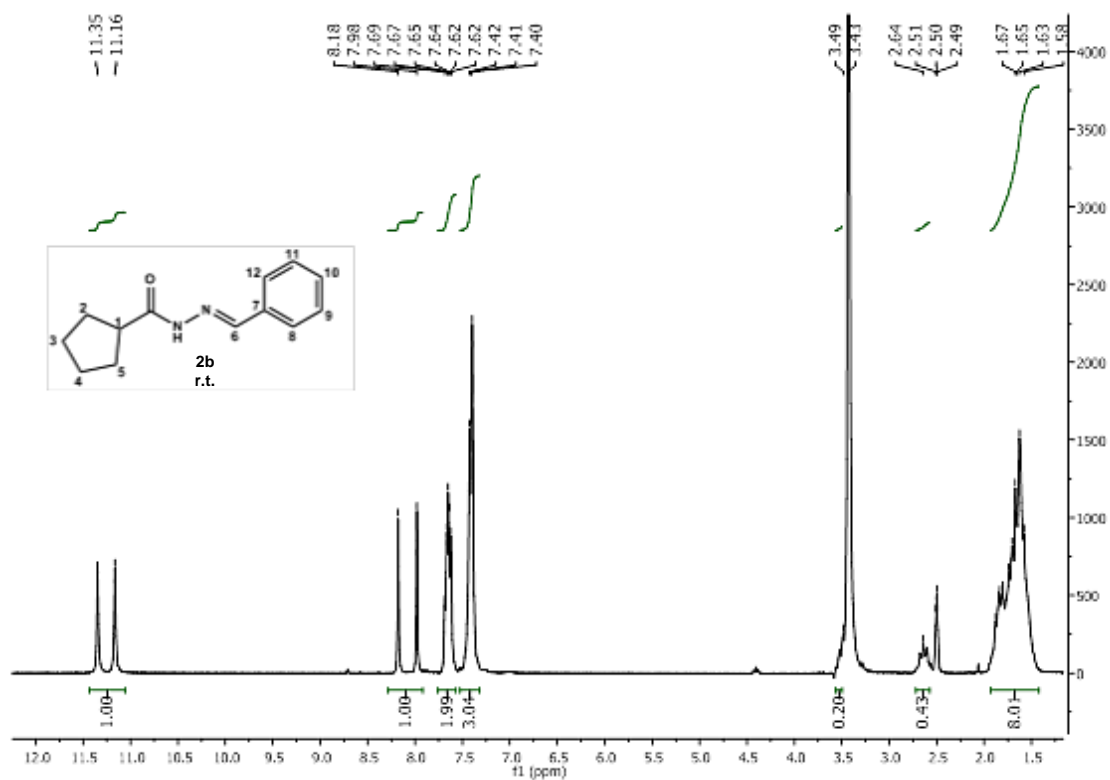

**Figure S3.** <sup>1</sup>H NMR spectrum of **2b** (DMSO-d<sub>6</sub>, 200 MHz).

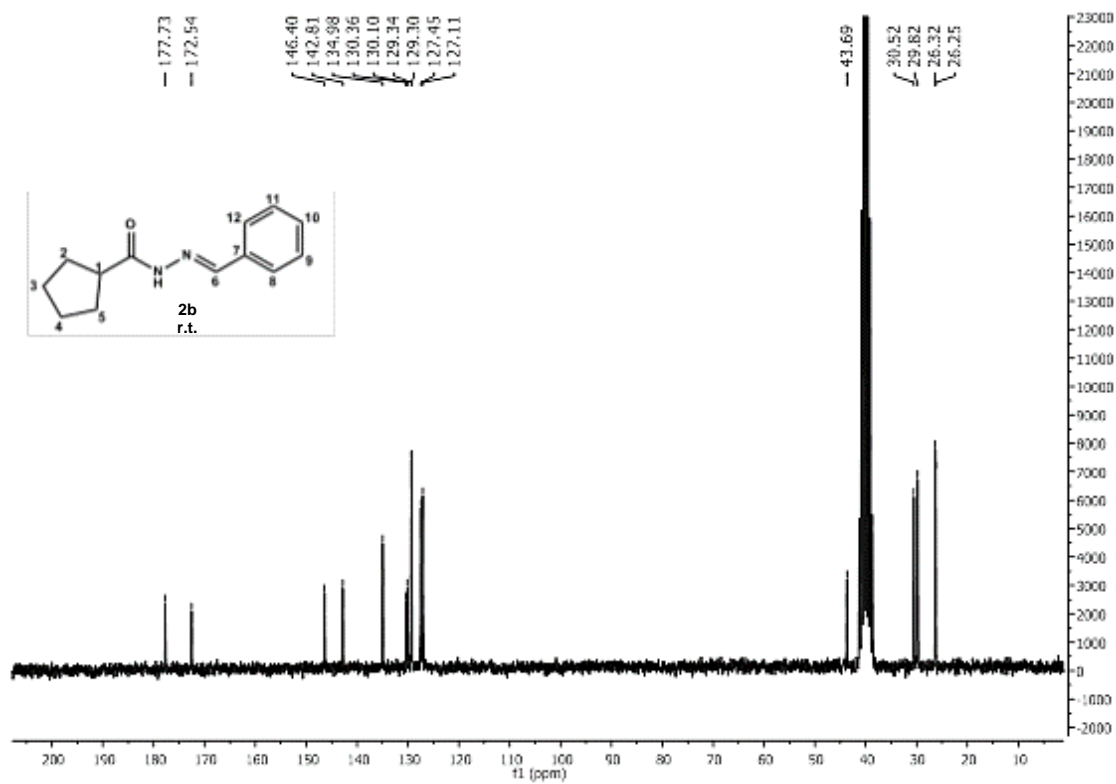

**Figure S4.** <sup>13</sup>C NMR spectrum of **2b** (DMSO-d<sub>6</sub>, 50 MHz).

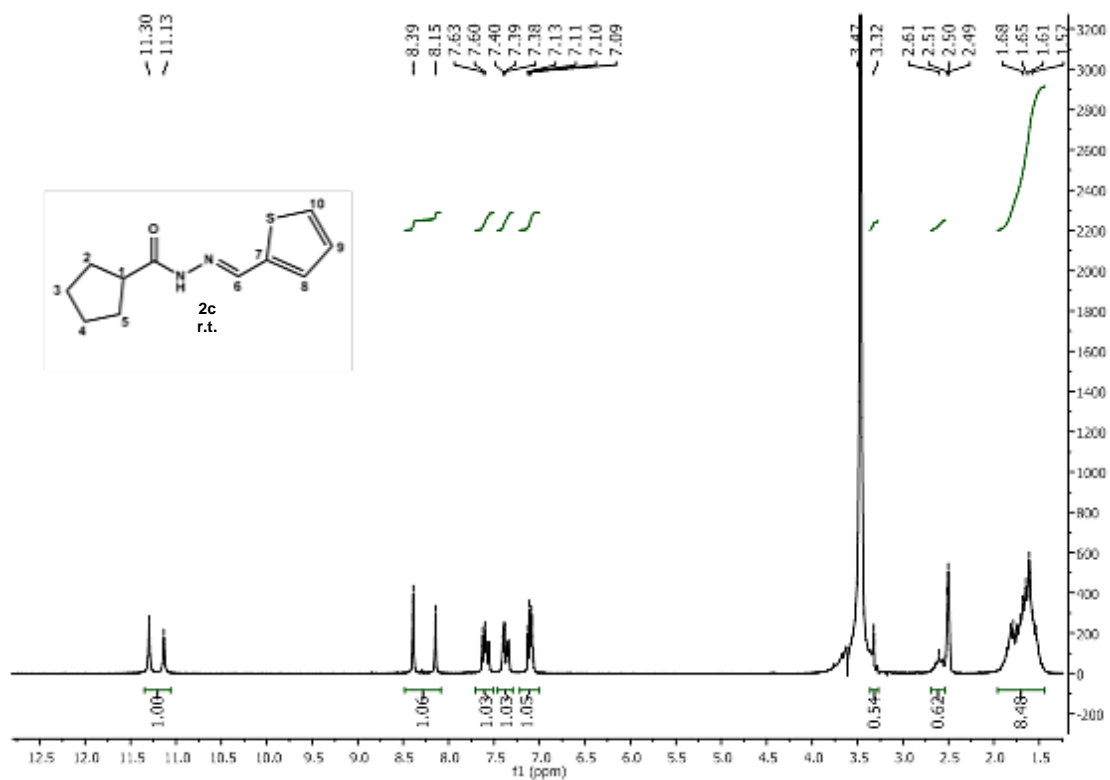

**Figure S5.** <sup>1</sup>H NMR spectrum of **2c** (DMSO-d<sub>6</sub>, 200 MHz).

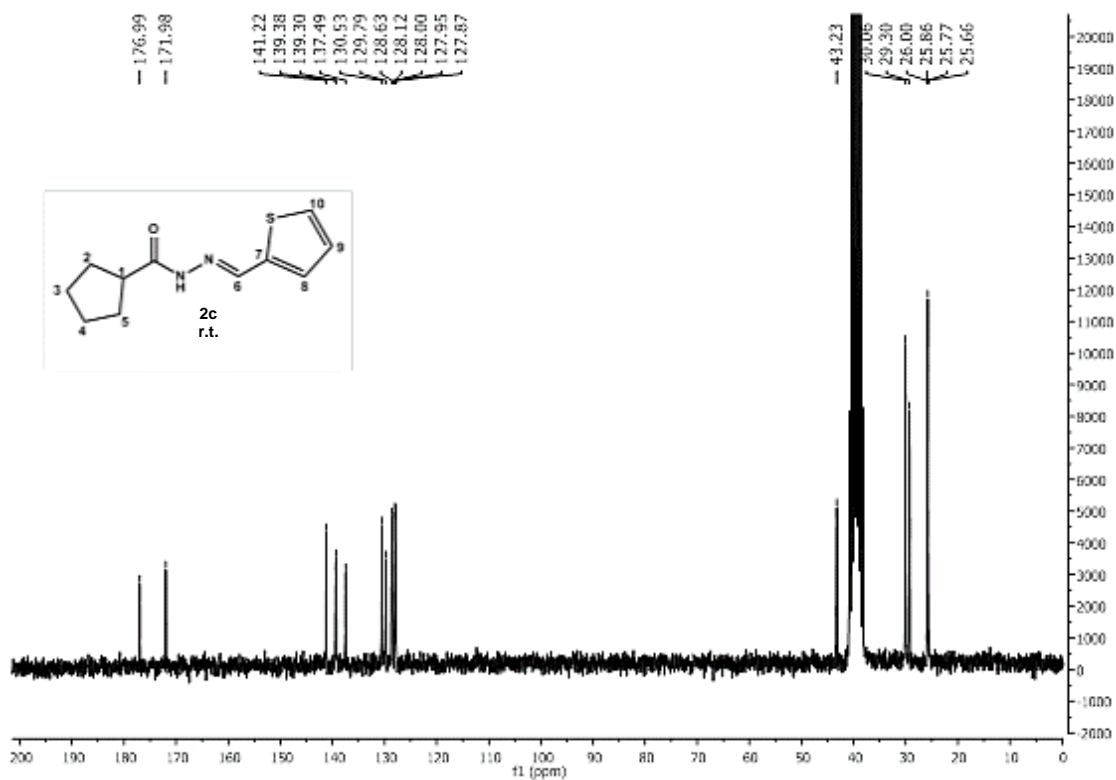

**Figure S6.**  $^{13}\text{C}$  NMR spectrum of **2c** (DMSO- $d_6$ , 50 MHz).

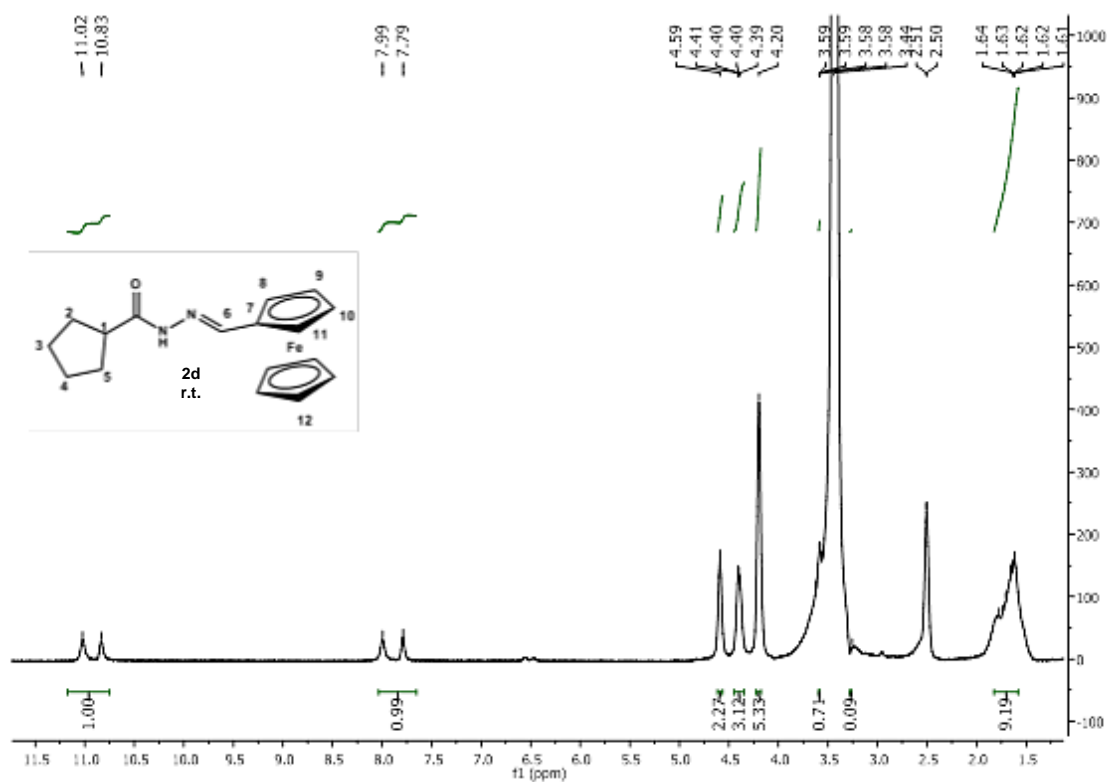

**Figure S7.**  $^1\text{H}$  NMR spectrum of **2d** (DMSO- $d_6$ , 200 MHz).

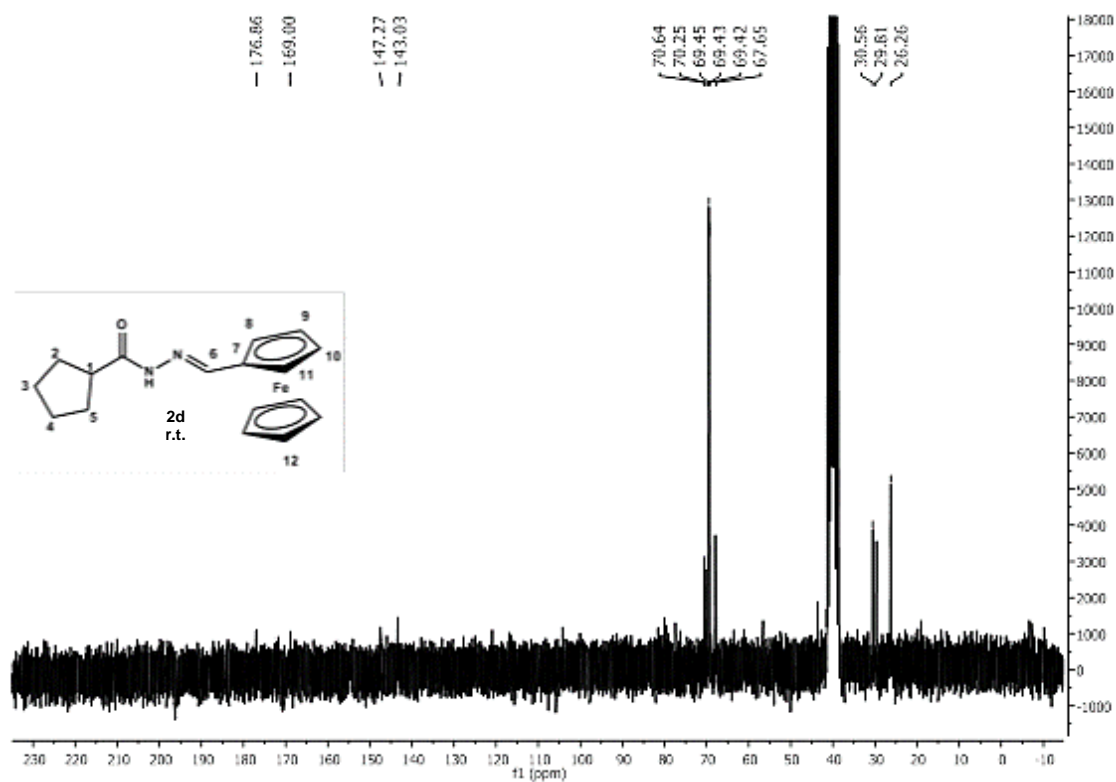

**Figure S8.** <sup>13</sup>C NMR spectrum of **2d** (DMSO-d<sub>6</sub>, 50 MHz).

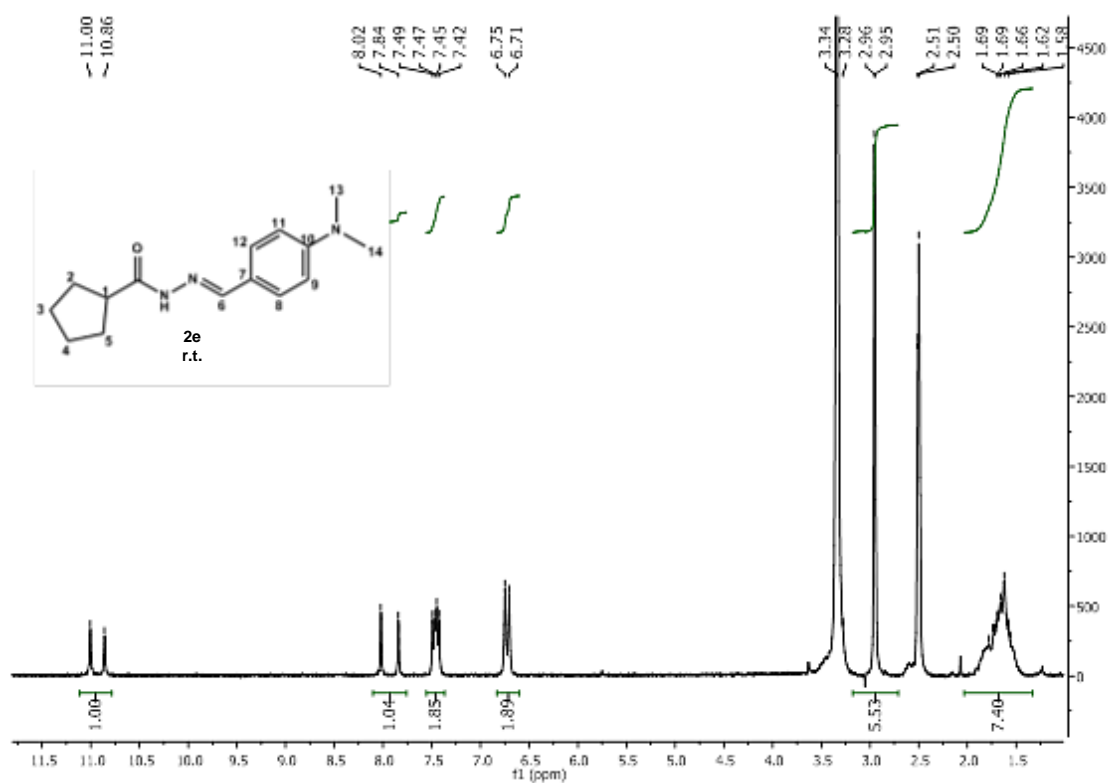

**Figure S9.** <sup>1</sup>H NMR spectrum of **2e** (DMSO-d<sub>6</sub>, 200 MHz).

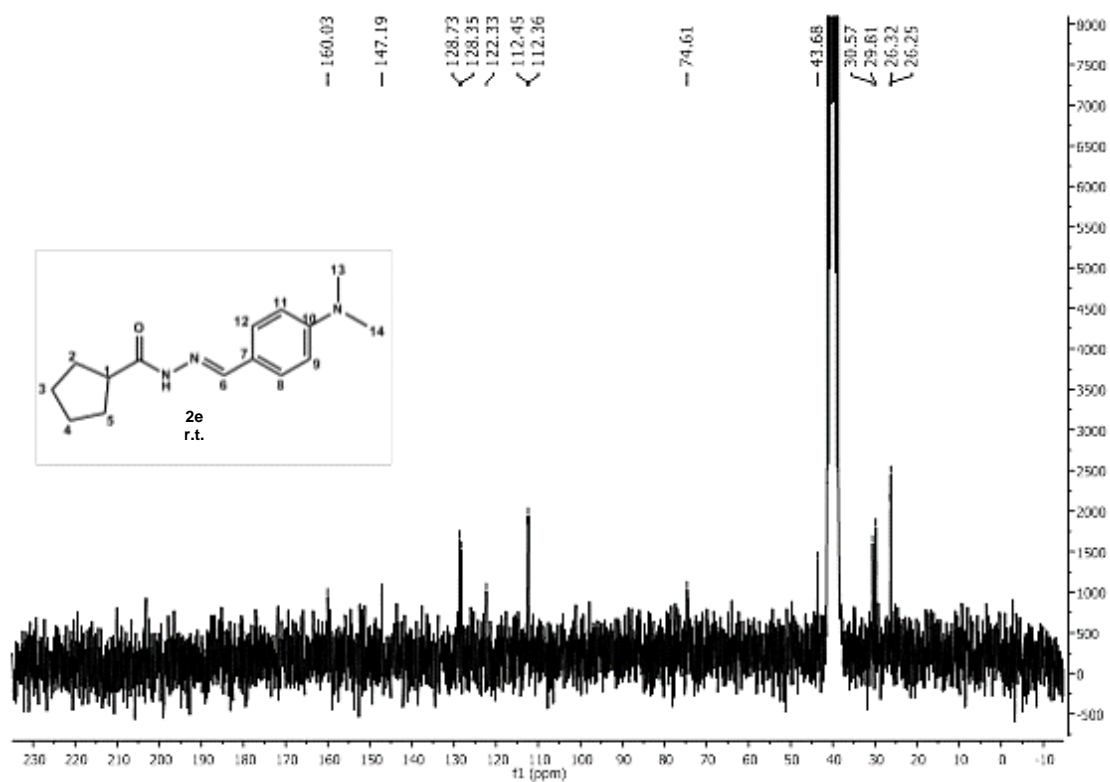

**Figure S10.** <sup>13</sup>C NMR spectrum of **2e** (CDCl<sub>3</sub>, 50 MHz).

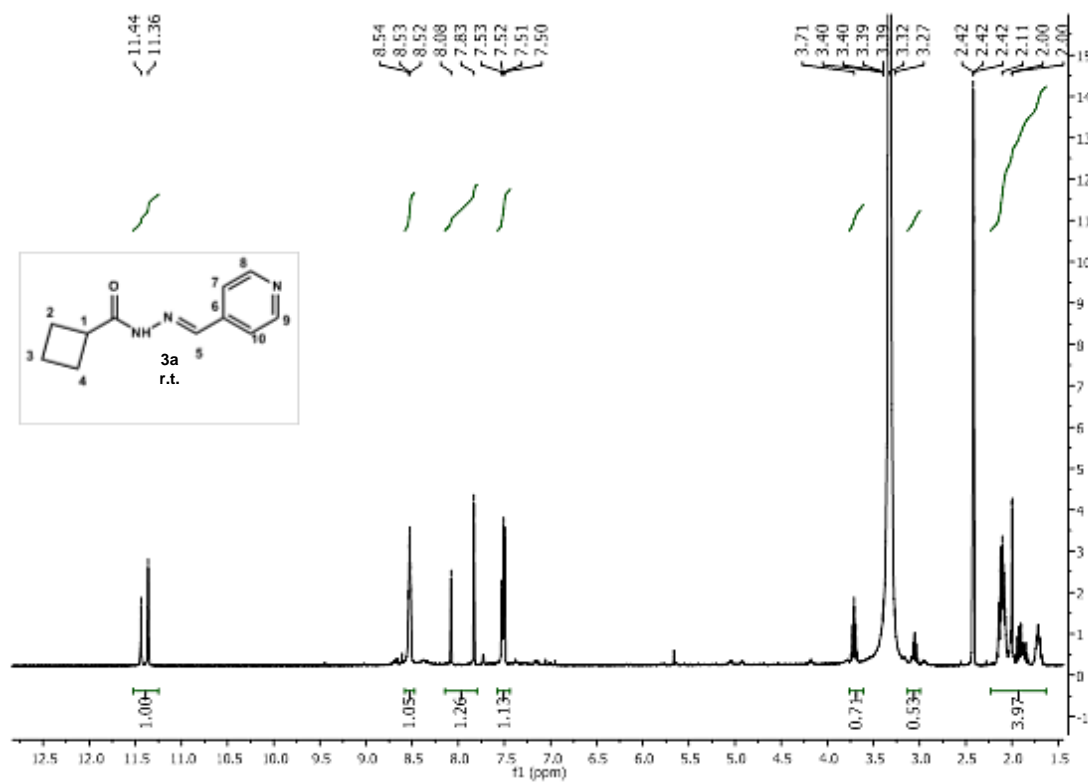

**Figure S11.** <sup>1</sup>H NMR spectrum of **3a** (DMSO-d<sub>6</sub>, 200 MHz).

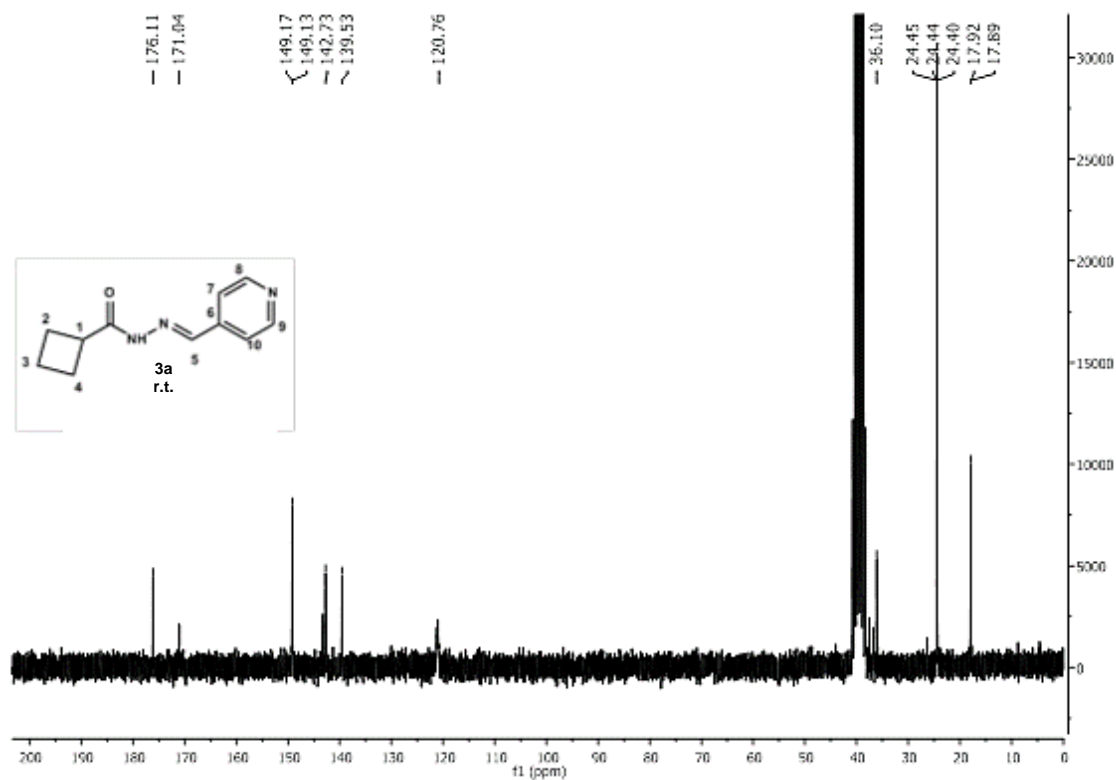

**Figure S12.** <sup>13</sup>C NMR spectrum of **3a** (DMSO-d<sub>6</sub>, 50 MHz).

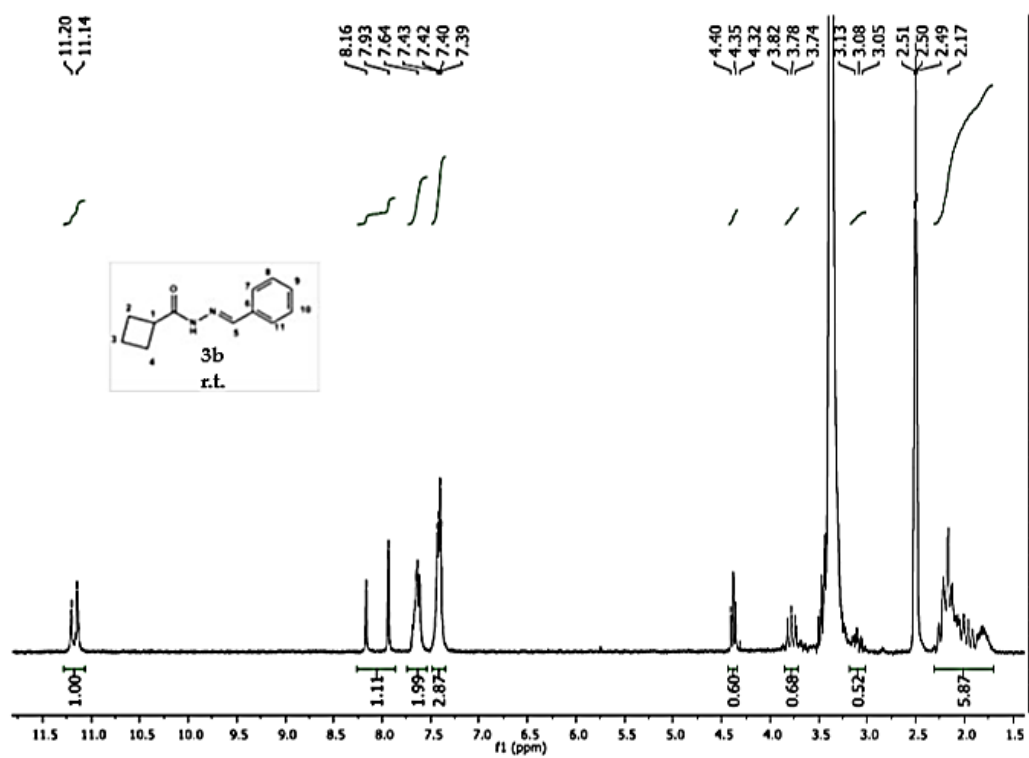

**Figure S13.** <sup>1</sup>H NMR spectrum of **3b** (DMSO-d<sub>6</sub>, 400 MHz).

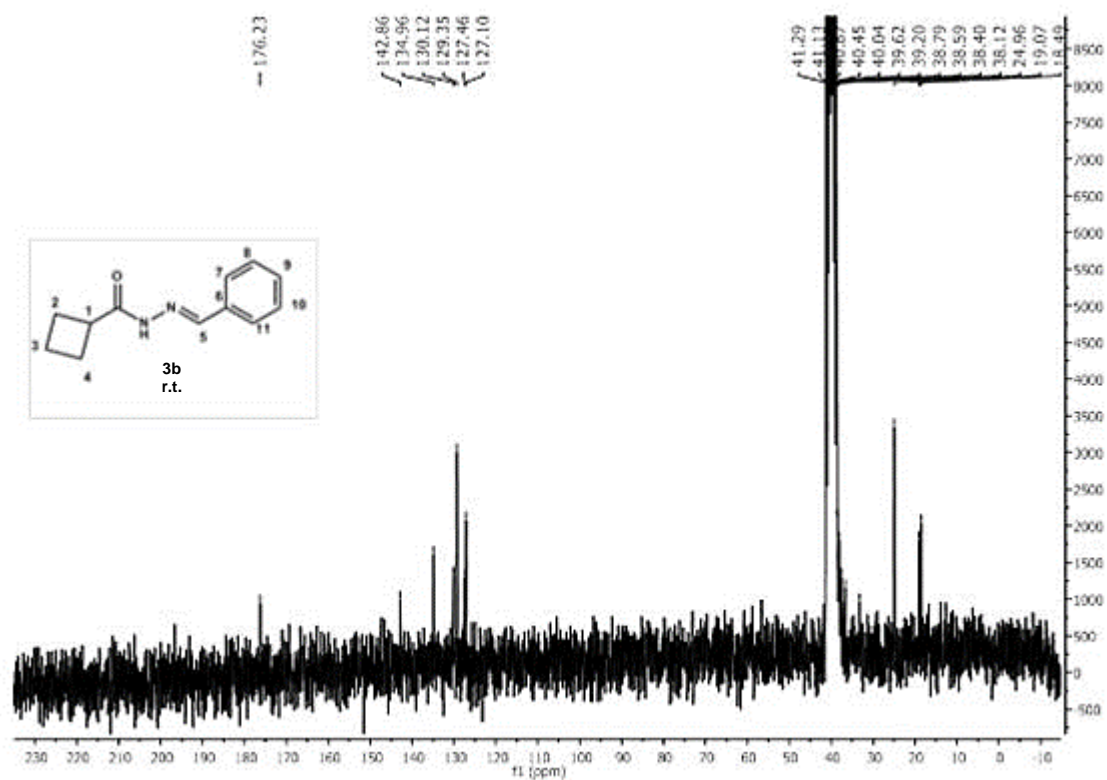

Figure S14.  $^{13}\text{C}$  NMR spectrum of **3b** (DMSO- $d_6$ , 50 MHz).

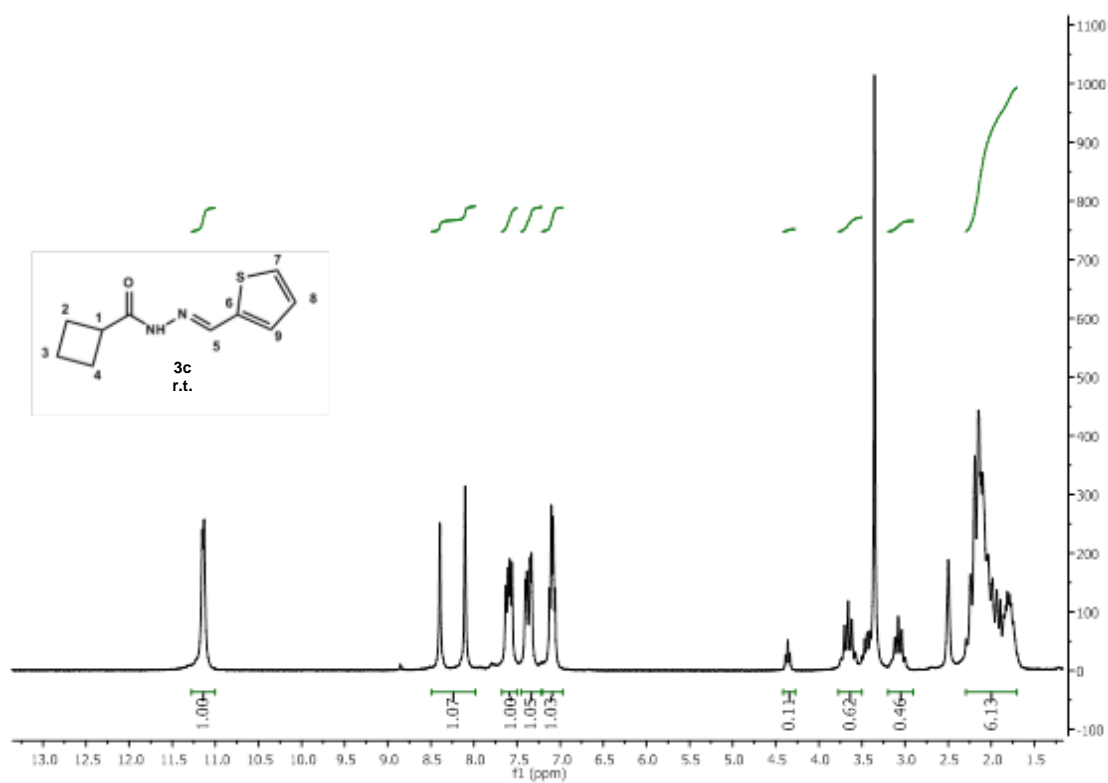

Figure S15.  $^1\text{H}$  NMR spectrum of **3c** (DMSO- $d_6$ , 200 MHz).



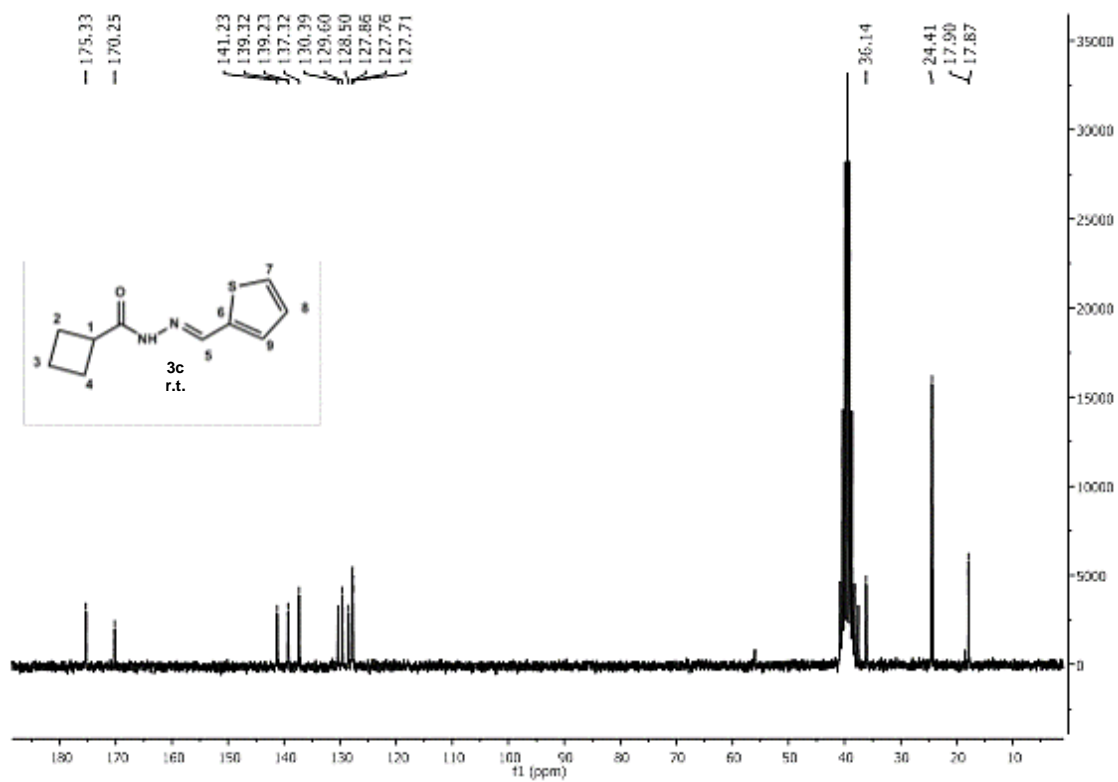

**Figure S16.**  $^{13}\text{C}$  NMR spectrum of **3c** (DMSO- $d_6$ , 50 MHz).

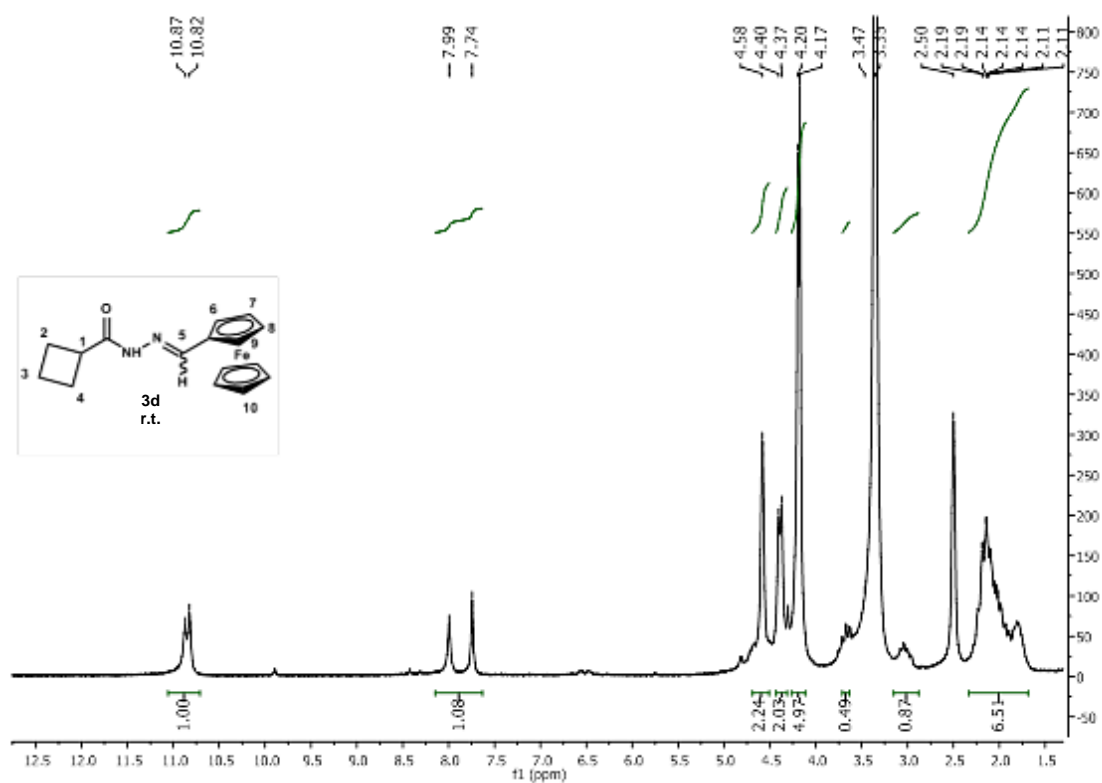

**Figure S17.**  $^1\text{H}$  NMR spectrum of **3d** (DMSO- $d_6$ , 200 MHz).

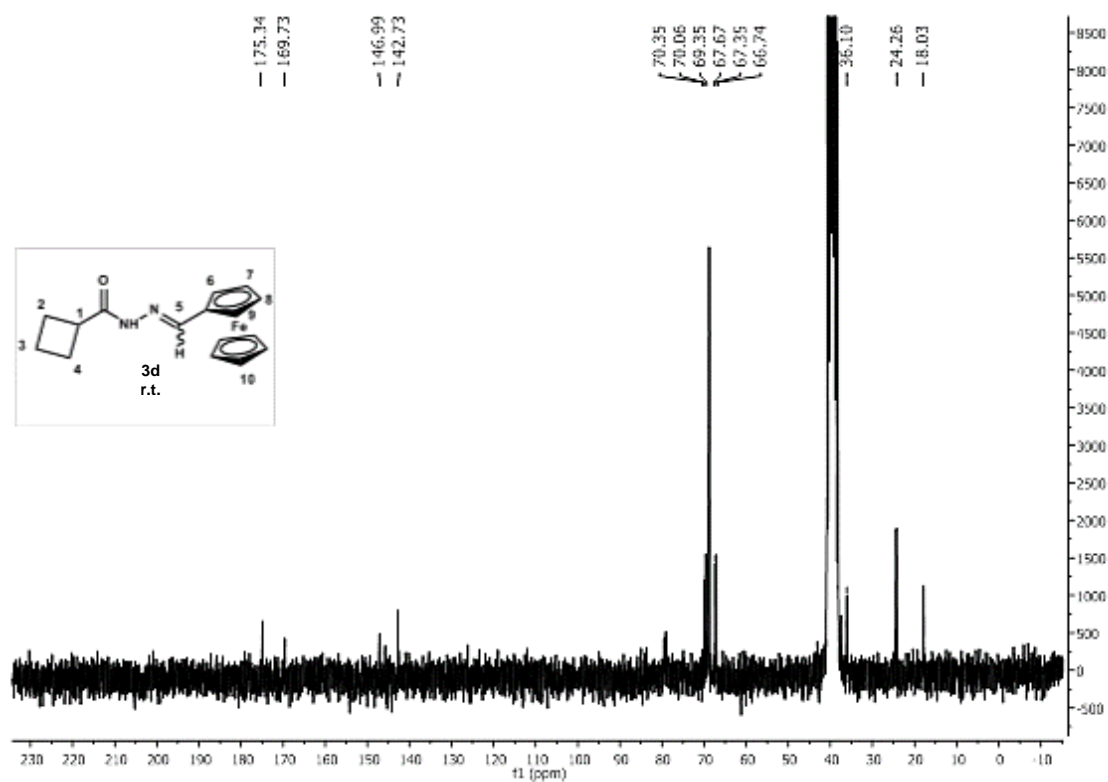

Figure S18. <sup>13</sup>C NMR spectrum of **3d** (DMSO-d<sub>6</sub>, 50 MHz).

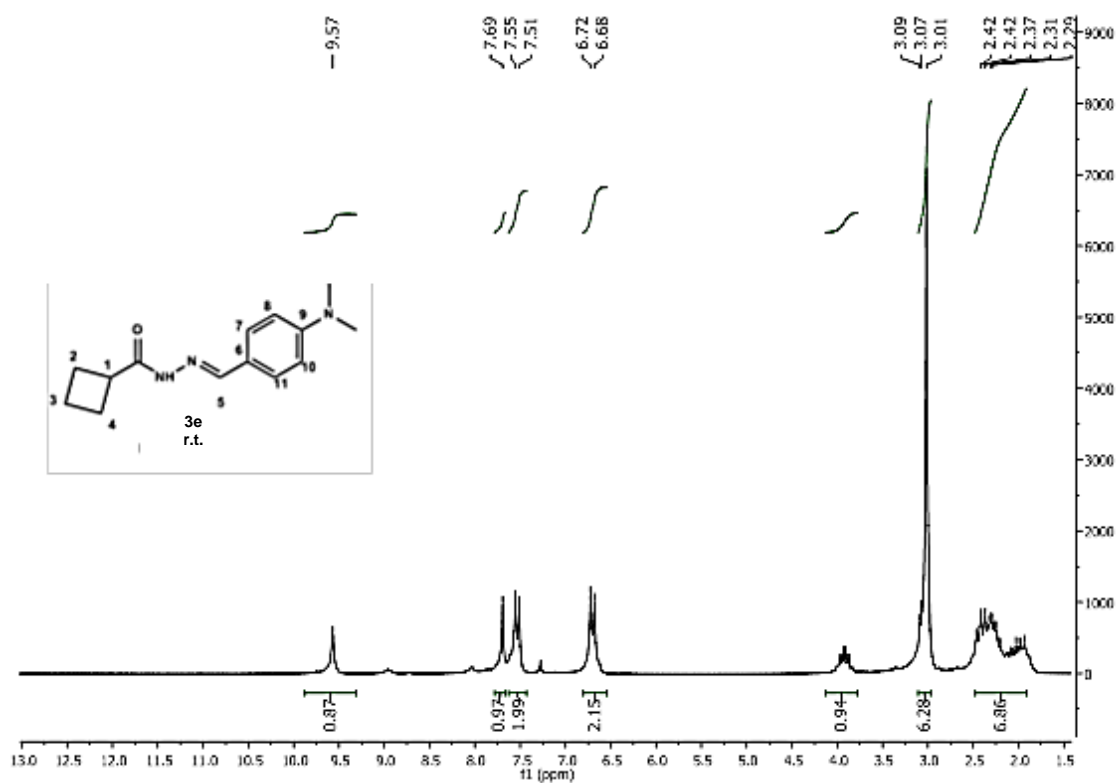

Figure S19. <sup>1</sup>H NMR spectrum of **3e** (CDCl<sub>3</sub>, 200 MHz).

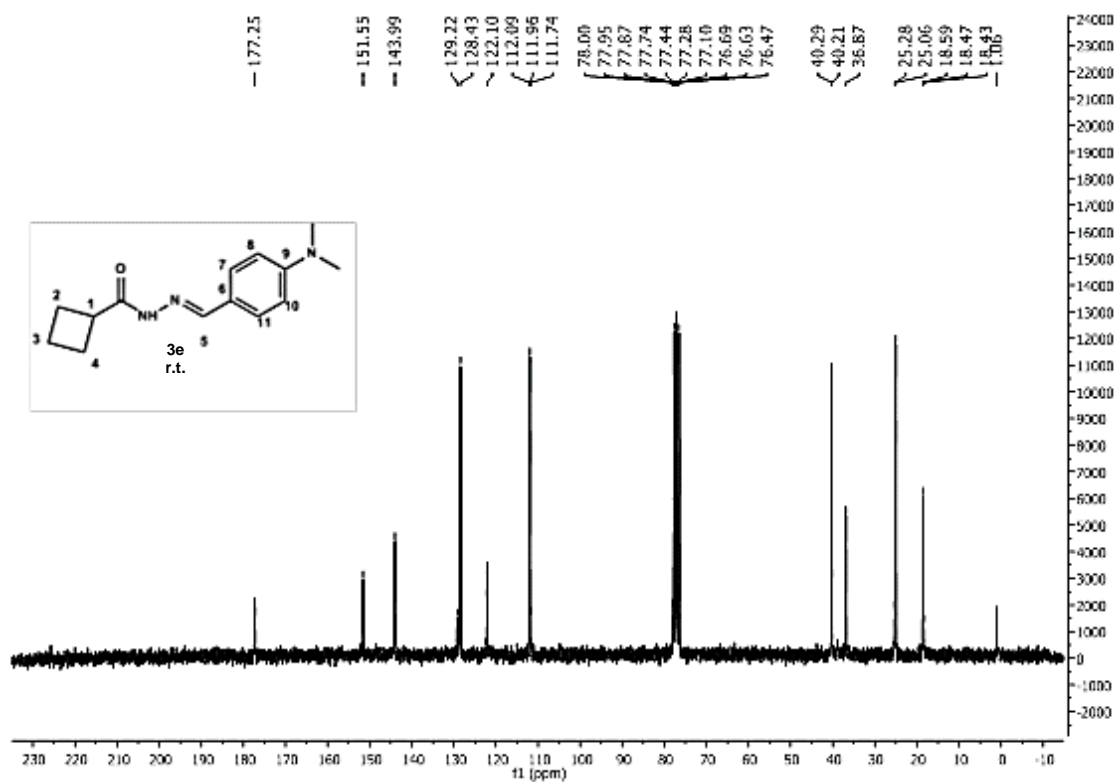

Figure S20.  $^{13}\text{C}$  NMR spectrum of **3e** ( $\text{CDCl}_3$ , 50 MHz).

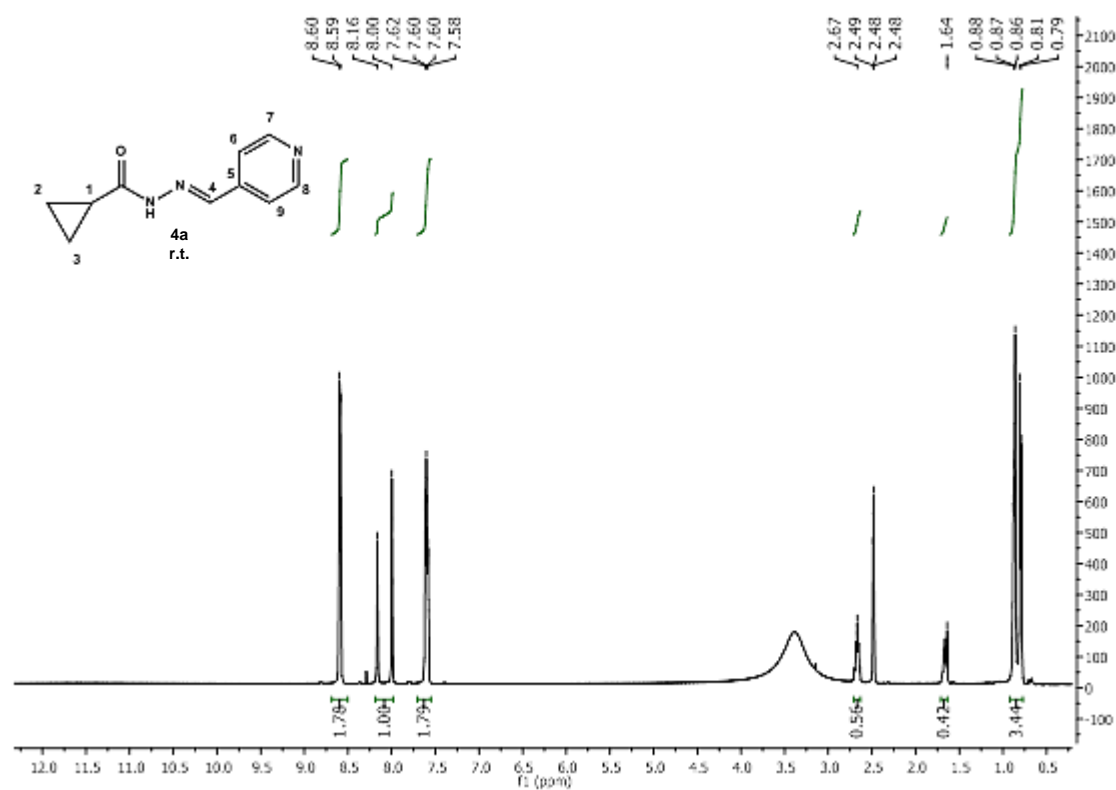

Figure S21.  $^1\text{H}$  NMR spectrum of **4a** ( $\text{DMSO}-d_6$ , 200 MHz).

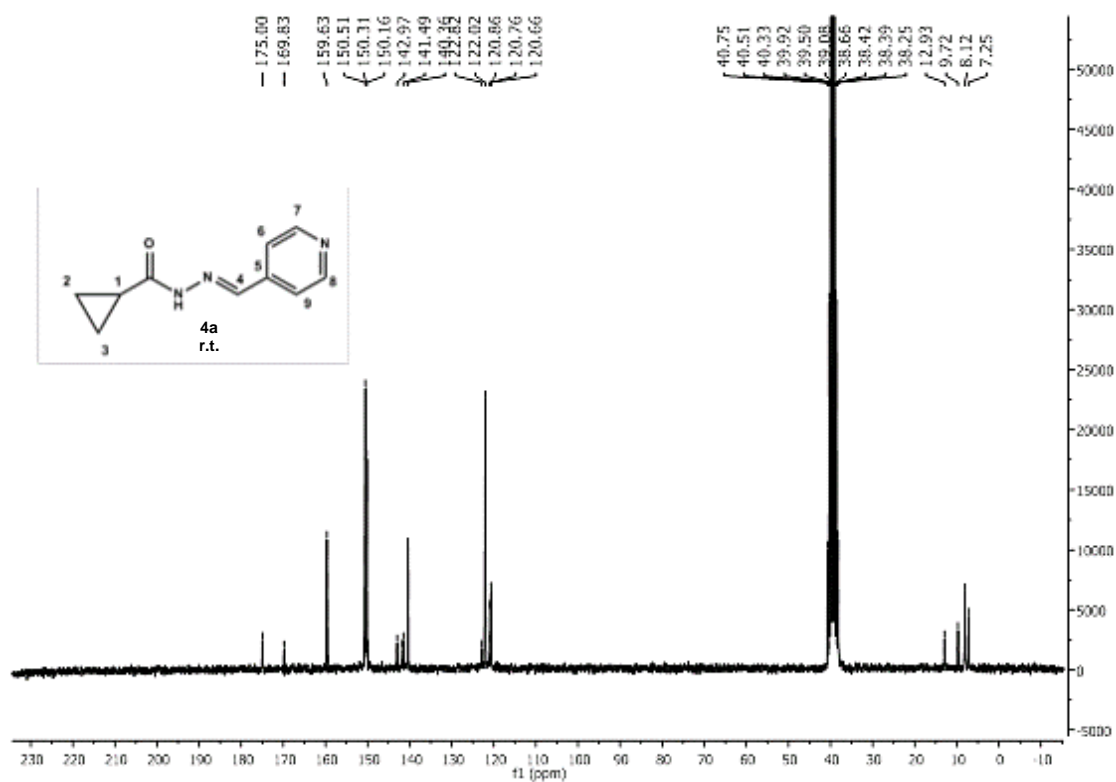

**Figure S22.**  $^{13}\text{C}$  NMR spectrum of **4a** (DMSO- $d_6$ , 50 MHz).

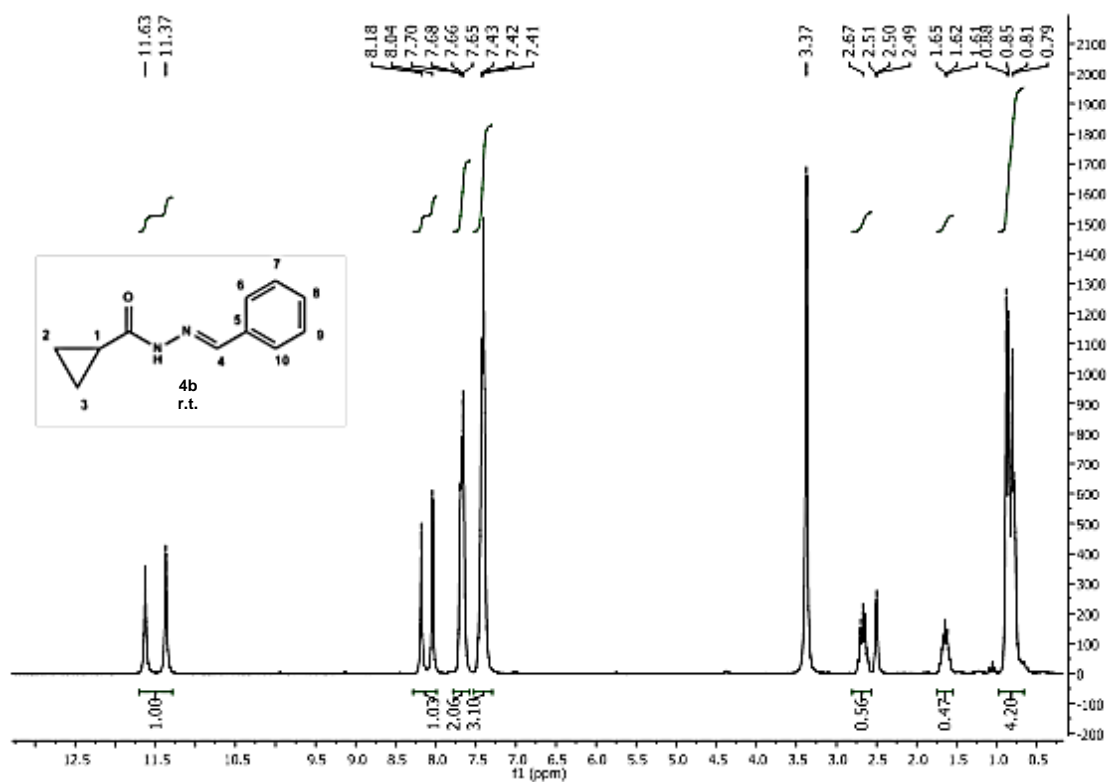

**Figure S23.**  $^1\text{H}$  NMR spectrum of **4b** (DMSO- $d_6$ , 200 MHz).

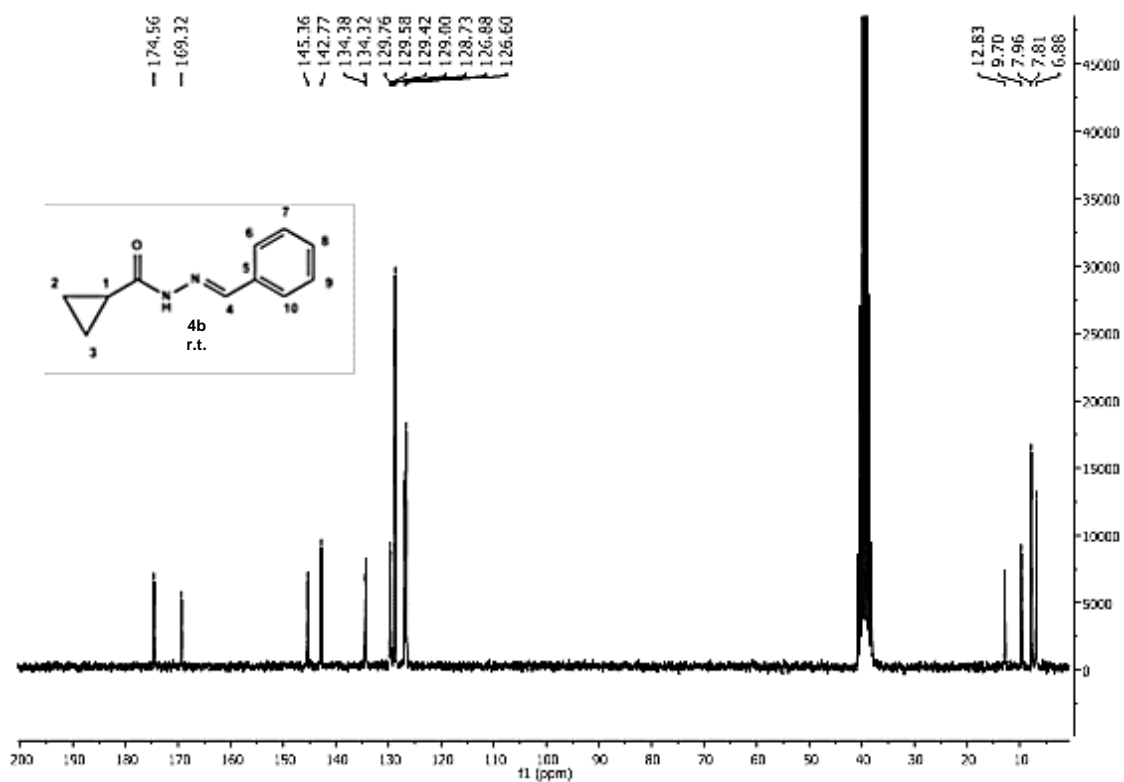

**Figure S24.** <sup>13</sup>C NMR spectrum of **4b** (DMSO-d<sub>6</sub>, 50 MHz).

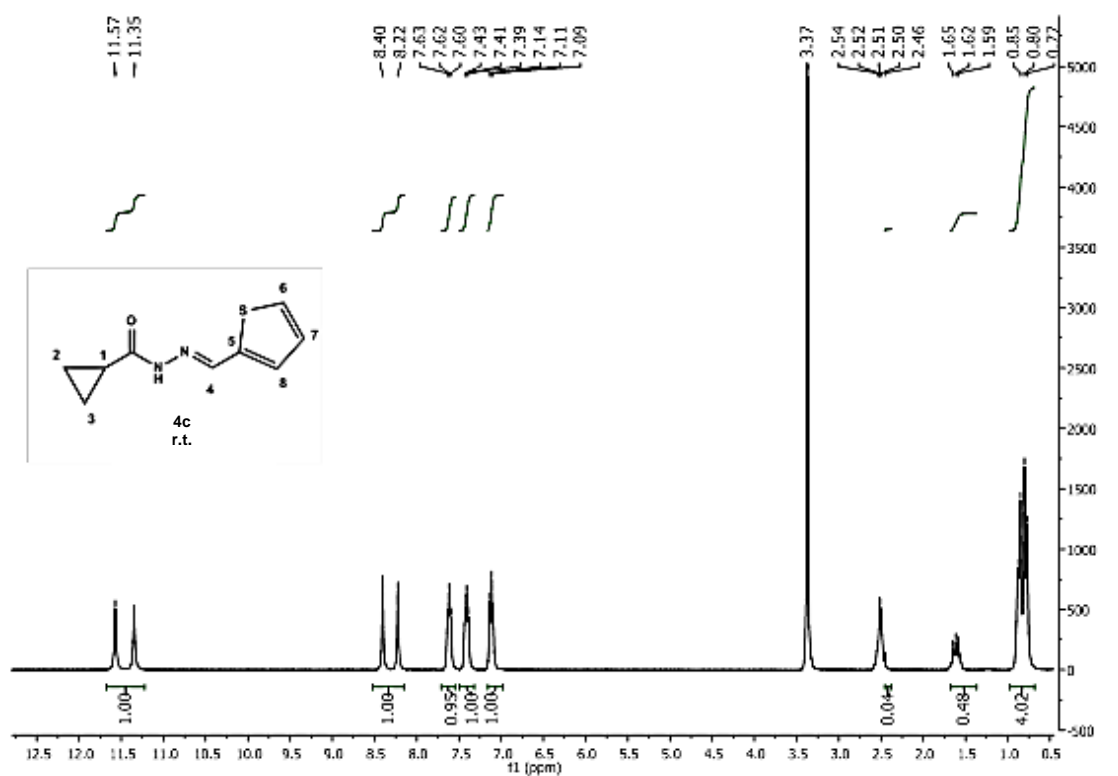

**Figure S25.** <sup>1</sup>H NMR spectrum of **4c** (DMSO-d<sub>6</sub>, 200 MHz).

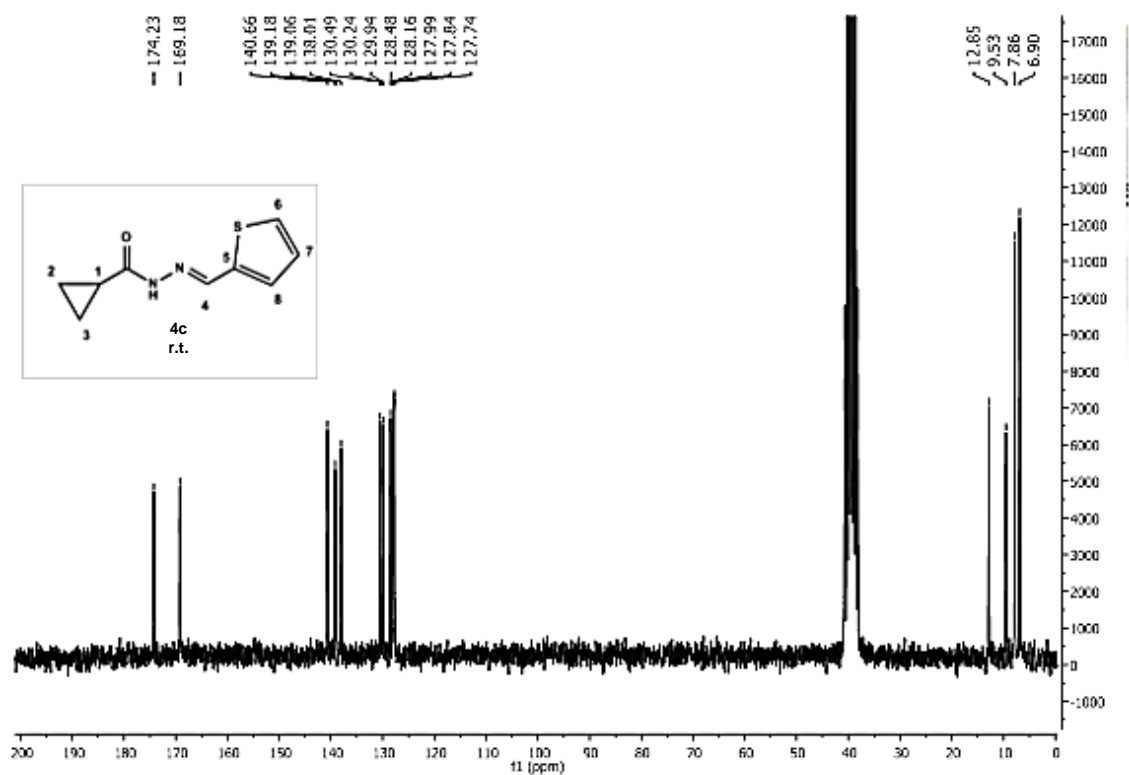

Figure S26. <sup>13</sup>C NMR spectrum of **4c** (DMSO-d<sub>6</sub>, 50 MHz).

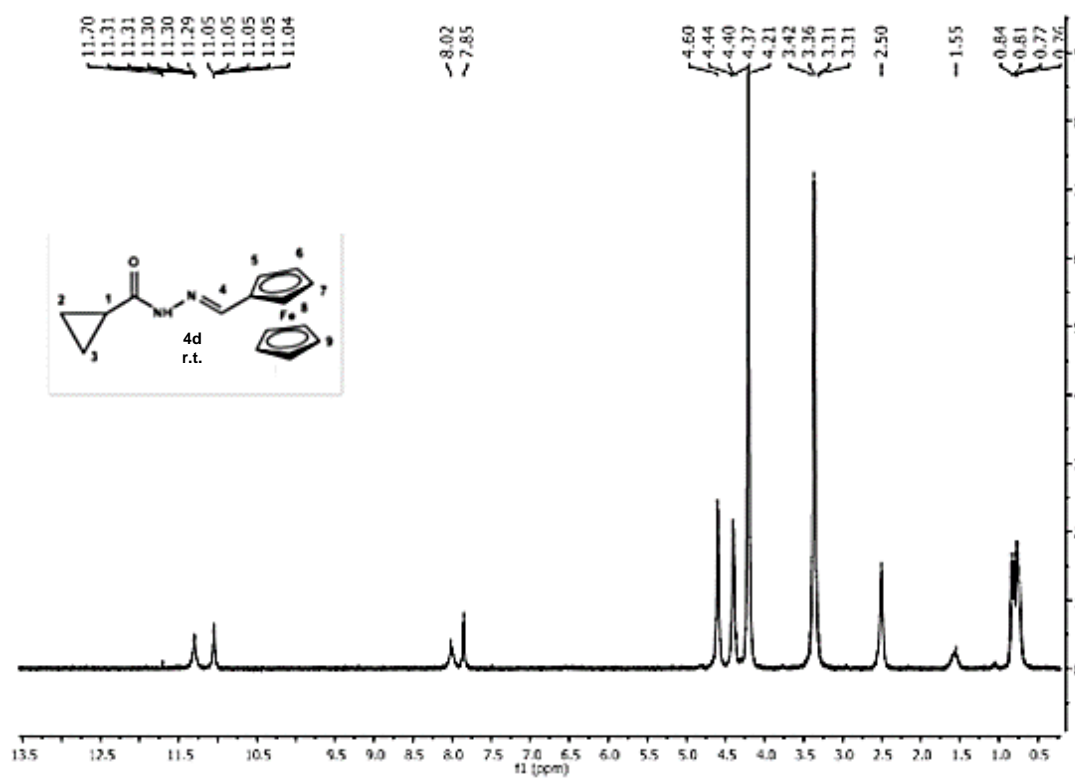

Figure S27. <sup>1</sup>H NMR spectrum of **4d** (DMSO-d<sub>6</sub>, 200 MHz).

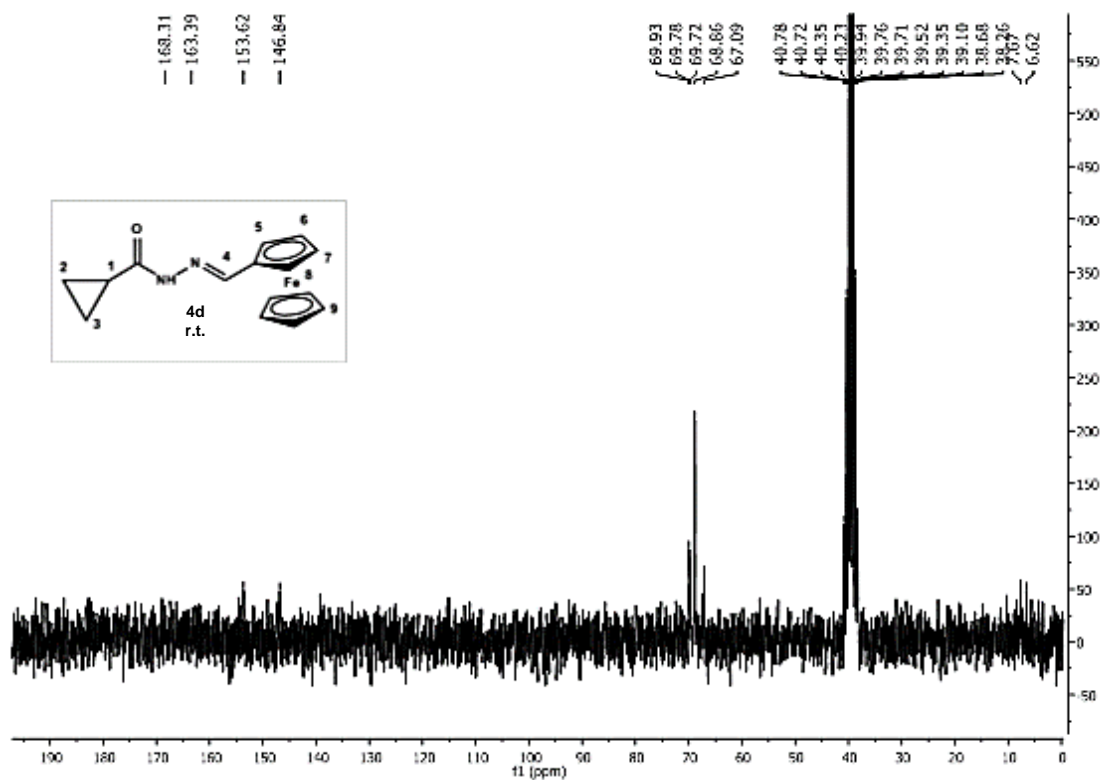

**Figure S28.** <sup>13</sup>C NMR spectrum of **4d** (DMSO-d<sub>6</sub>, 50 MHz).

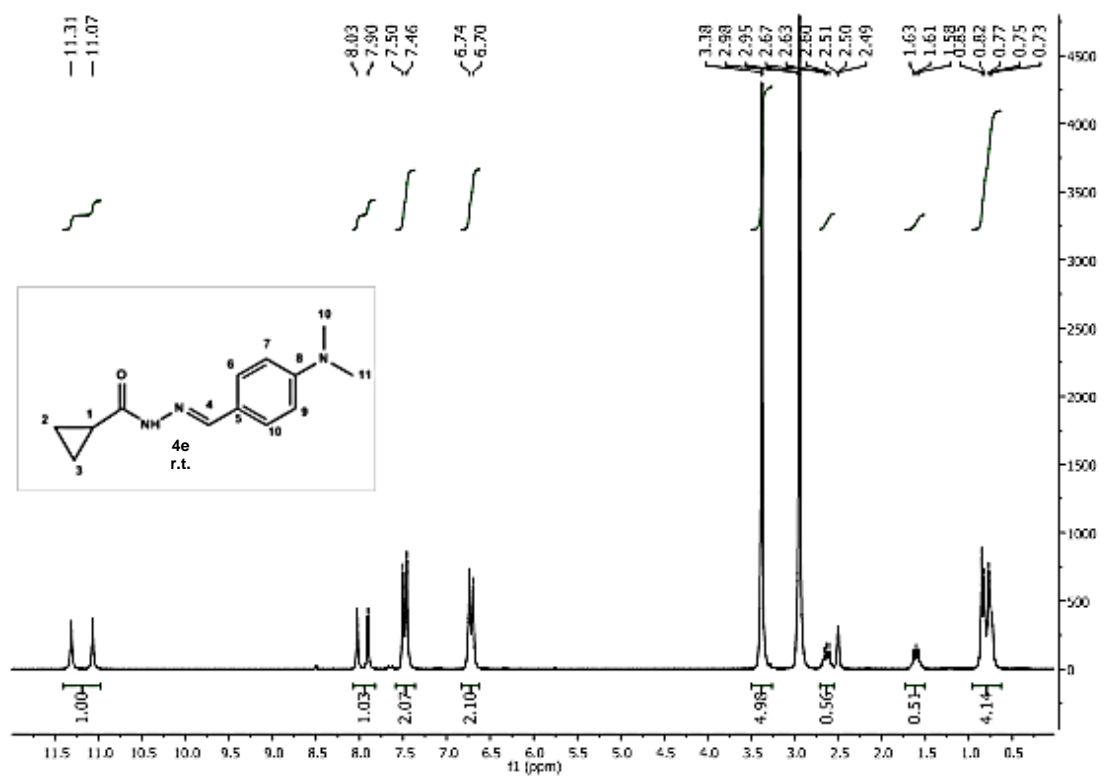

**Figure S29.** <sup>1</sup>H NMR spectrum of **4e** (DMSO-d<sub>6</sub>, 200 MHz).

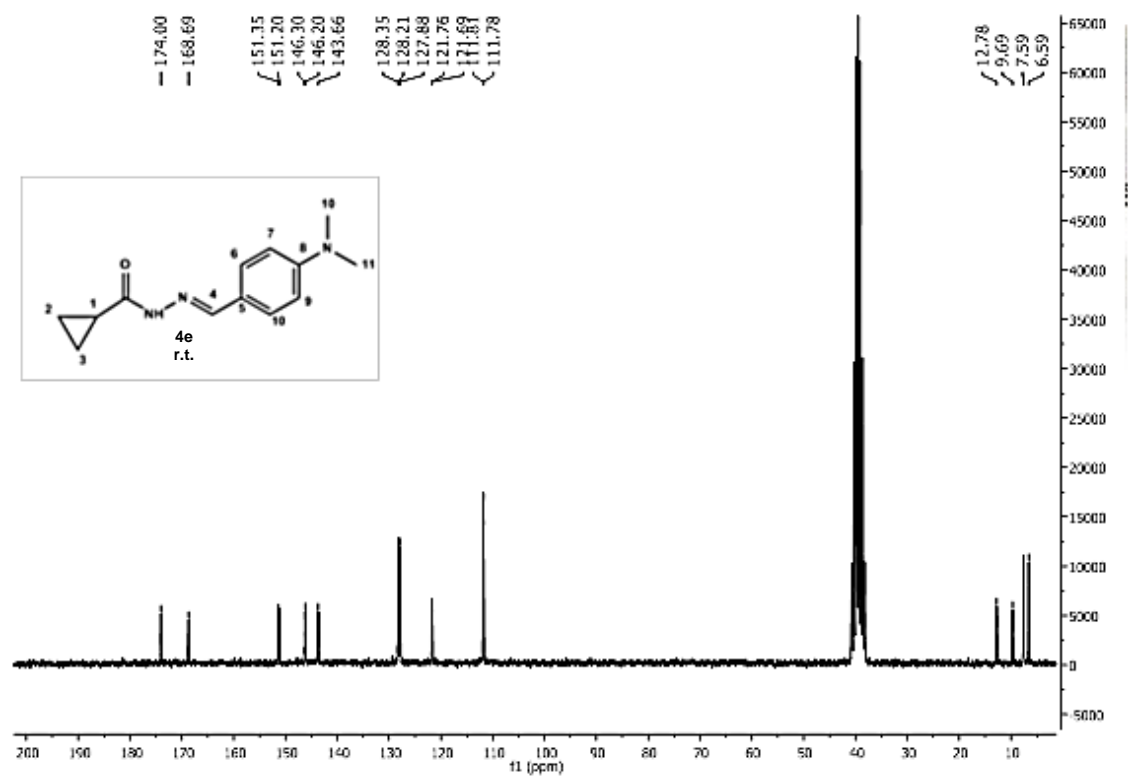

**Figure S30.** <sup>13</sup>C NMR spectrum of **4e** (DMSO-d<sub>6</sub>, 50 MHz).



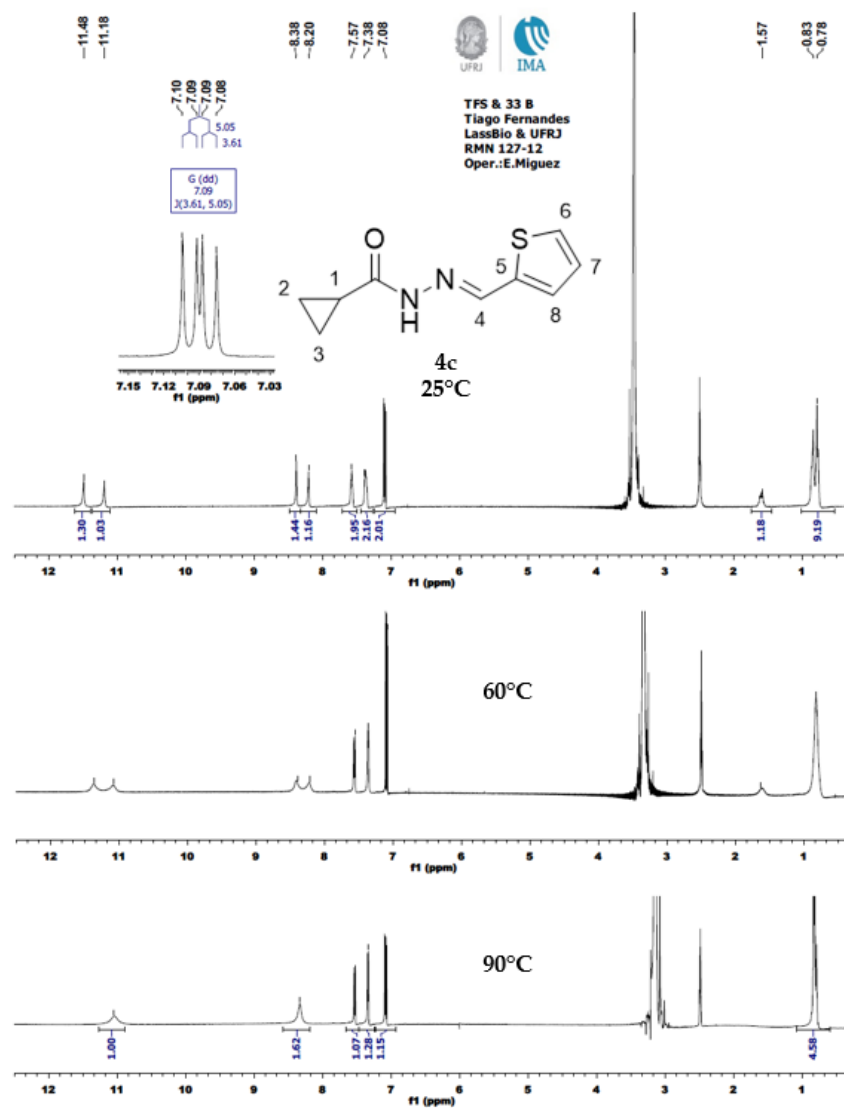

Figure S31.  $^1\text{H}$  NMR spectra of **4c** at different temperatures (DMSO- $d_6$ , 300 MHz).
